# Supplementary material for: TET-dependent regulation of retrotransposable elements in mouse embryonic stem cells
Source: Genome Biol. 2016 Nov 18;17:234. doi: 10.1186/s13059-016-1096-8 (PMC5116139; doi:10.1186/s13059-016-1096-8)
Supplement: Additional file 1: — List of TET1-bound TEs using either unique or inclusive mapping. (XLSX 51 kb) [file 13059_2016_1096_MOESM1_ESM.xlsx]

## Sheet: Unique
Repeat class	TET1 peaks	Random peaks	Adjusted p-value
LINE
L1Md_A	300	76	1.074e-31
L1Md_Gf	55	9	1.14484e-08
L1Md_T	569	128	1.25103e-66
L2b	768	519	7.8544e-12
LTR
IAPEY_LTR	34	5	9.27877e-06
IAPEY2_LTR	70	14	1.19324e-09
MMERVK10C-int	35	11	0.00184416
RLTR10	39	8	2.31076e-05
RLTR10C	54	8	7.26023e-09
RLTR10D	63	24	9.30937e-05
RLTR13B1	40	9	3.26196e-05
RLTR13B2	40	3	5.7251e-09
RLTR13D6	87	48	0.00246231
RLTR1B	68	26	5.58065e-05
RLTR1B-int	55	7	7.32859e-10
RLTR27	69	20	6.16897e-07
RLTR44C	27	5	0.000240105
RLTR45	72	20	1.60376e-07
RLTR45-int	37	10	0.000352685
RLTR46	27	6	0.000997812
RLTR9A	109	54	5.46689e-05
RLTR9B	30	5	5.15942e-05
RLTR9B2	64	10	5.63361e-11
RLTR9C	39	5	4.97803e-07
RLTR9D	126	27	7.1069e-17
RLTR9E	216	50	1.38924e-26
RLTRETN_Mm	134	24	4.19733e-19
RMER10A	310	196	1.0274e-06
RMER10B	196	135	0.00240571
RMER13B	189	135	0.00694925
RMER17A-int	35	12	0.00264644
RMER17B	305	215	0.00020426
RMER21A	58	20	4.65879e-05
SINE
B2_Mm1a	426	341	0.00690274
ID_B1	5294	4534	3.81275e-14
MIR	2179	1691	8.94495e-15
MIR3	570	381	2.03101e-09
MIRb	2080	1712	5.7251e-09
MIRc	1286	878	2.53587e-18
MIRm	573	332	1.58859e-15
PB1D7	1097	941	0.00163557
rRNA
LSU-rRNA_Hsa	37	10	0.000265964
Satellite
ZP3AR	230	106	1.52747e-11
Simple repeat
(C)n	196	54	5.98257e-21
(CACCC)n	122	53	3.20074e-07
(CACG)n	142	33	1.00357e-17
(CAG)n	221	75	6.41443e-18
(CAGGG)n	42	11	4.25784e-05
(CCCCAG)n	67	25	2.53359e-05
(CCCCCA)n	237	105	5.94304e-13
(CCCCCG)n	41	7	3.57659e-07
(CCCCG)n	219	14	4.08544e-58
(CCCG)n	89	9	6.78641e-20
(CCCGG)n	34	2	3.5216e-10
(CCCTG)n	45	9	1.29133e-06
(CCG)n	357	40	3.60224e-79
(CCGAG)n	8	0	0.00777597
(CCGCG)n	32	2	7.72264e-09
(CCGGG)n	33	2	2.28518e-09
(CG)n	107	29	7.56338e-12
(CGAG)n	45	3	3.06451e-12
(CGCGG)n	28	4	5.81781e-06
(CGG)n	310	40	1.59381e-63
(CGGA)n	15	2	0.00454303
(CGGG)n	95	11	2.67966e-20
(CGGGG)n	216	29	8.91069e-45
(CGGGGG)n	40	4	1.05946e-08
(CGGTG)n	9	0	0.002773
(CGTG)n	147	43	8.34198e-15
(CTCCG)n	15	1	0.000186158
(CTCG)n	49	3	2.51687e-12
(CTCGG)n	22	0	1.17531e-08
(CTG)n	206	70	1.08456e-16
(CTGGGG)n	47	15	0.000136607
(G)n	159	37	1.74217e-19
(GGCTG)n	38	6	1.27333e-06
(GGGTG)n	113	31	5.27643e-12
(TCCG)n	21	3	0.000469208
(TCG)n	24	3	7.78609e-05
(TGGGGG)n	203	79	9.83383e-14
Low complexity
C-rich	776	228	9.6659e-75
G-rich	774	251	2.25959e-66
GC_rich	3114	315	0

## Sheet: Inclusive
Repeat class	TET1 peaks	Random peaks	Adjusted p-value
LINE
L1Md_A	3013	1724	1.97536e-90
L1Md_Gf	446	100	8.59034e-70
L1Md_T	4547	2528	1.47147e-149
L2b	704	457	9.12765e-13
L2c	489	377	0.000450382
LTR
IAPEY_LTR	172	26	9.63705e-29
IAPEY2_LTR	245	46	2.34416e-37
LTR41B	24	7	0.00795867
MMVL30-int	98	47	5.35033e-05
RLTR10D	89	38	1.3594e-05
RLTR13B1	69	37	0.00593079
RLTR13B2	102	17	5.97861e-18
RLTR13D6	136	63	3.76912e-07
RLTR1B	146	63	1.51834e-08
RLTR27	122	51	1.56246e-07
RLTR4_Mm	61	8	5.58323e-12
RLTR4_MM-int	158	40	1.78278e-20
RLTR44C	37	9	5.75115e-05
RLTR45	212	69	1.69411e-18
RLTR46	89	23	1.98096e-10
RLTR9B2	70	9	2.91414e-13
RLTR9D	171	32	6.74681e-26
RLTR9E	265	67	1.07654e-30
RLTRETN_Mm	252	106	9.04149e-15
RMER10A	278	178	7.97226e-06
RMER10B	178	119	0.00189587
RMER13B	196	105	3.11761e-07
RMER17B	313	176	9.45426e-10
RMER21A	59	29	0.00407769
SINE
ID_B1	4791	3781	1.33345e-27
MIR	2000	1501	7.22417e-17
MIR3	542	317	2.87346e-14
MIRb	1941	1425	1.07496e-18
MIRc	1204	720	1.47643e-28
MIRm	539	275	1.91024e-20
rRNA
5S	68	35	0.00375495
Satellite
ZP3AR	214	82	1.33137e-14
Simple repeat
(C)n	184	36	4.30622e-26
(CACCC)n	111	27	4.05301e-13
(CACG)n	138	42	2.14791e-13
(CAG)n	215	60	8.26512e-22
(CAGCC)n	27	6	0.000694561
(CAGGG)n	40	13	0.00052324
(CCCA)n	81	36	9.94134e-05
(CCCCAG)n	63	14	2.32837e-08
(CCCCCA)n	223	67	5.00966e-21
(CCCCCG)n	35	5	1.26223e-06
(CCCCG)n	201	15	3.09114e-50
(CCCG)n	80	6	2.49892e-19
(CCCGG)n	31	1	6.97931e-10
(CCCTG)n	40	16	0.00386609
(CCG)n	320	30	8.09903e-74
(CCGCG)n	30	3	3.05205e-07
(CCGGG)n	30	1	3.70193e-09
(CG)n	106	24	1.13351e-13
(CGAG)n	44	2	8.11828e-13
(CGCGG)n	23	2	1.21592e-05
(CGG)n	283	22	2.28999e-68
(CGGA)n	15	2	0.00450649
(CGGG)n	80	5	3.93492e-20
(CGGGG)n	195	12	4.15848e-51
(CGGGGG)n	37	2	2.15695e-09
(CGTG)n	146	40	1.04236e-15
(CTCCG)n	14	1	0.000482224
(CTCG)n	98	7	1.01633e-27
(CTCGG)n	23	0	3.06361e-09
(CTG)n	204	67	2.78231e-17
(CTGGGG)n	43	12	8.16287e-05
(G)n	154	40	3.45446e-17
(GGCTG)n	38	6	1.23838e-06
(GGGTG)n	107	32	1.98368e-10
(TCCCC)n	87	46	0.00121703
(TCCCG)n	9	0	0.00611852
(TCCG)n	23	5	0.00136874
(TCG)n	22	6	0.00655348
(TGGGGG)n	186	80	1.00027e-10
Low complexity
C-rich	742	200	5.68488e-78
G-rich	719	200	5.70495e-73
GC_rich	2873	253	0
