# Supplementary material for: TET-dependent regulation of retrotransposable elements in mouse embryonic stem cells
Source: Genome Biol. 2016 Nov 18;17:234. doi: 10.1186/s13059-016-1096-8 (PMC5116139; doi:10.1186/s13059-016-1096-8)
Supplement: Additional file 3: — List of antibodies and primers. (XLSX 34 kb) [file 13059_2016_1096_MOESM3_ESM.xlsx]

## Sheet: Antibodies
Target	Catalogue Number	Provider
TET1 (WB)	09-872	Millipore
TET1 (ChIP)	GTX125888	GeneTex
TET2 (WB)	-	Gift from K. Helin
TET2 (ChIP)	Ab124297	Abcam
ORF1p (WB)	-	Gift from A. Bortvin
OGT (WB)	Sc-32921	Santa Cruz
OGT (ChIP)	ab50273	Abcam
O-Linked N-Acetylglucosamine (WB)	ab2739	Abcam
SIN3A (WB)	sc-994	Santa Cruz
SIN3A (ChIP)	ab3479	Abcam
OCT4 (ChIP)	Sc-8628X	Santa Cruz
H3K4me3 (ChIP)	C15410003	Diagenode
H3K9me3 (ChIP)	C15410193 (pAb-193-050)	Diagenode
Histone H3 (ChIP)	ab1791	Abcam

## Sheet: Primers
Target	Sequence (5'-3')	Application
RLTR13D6_F	GTCTGGTGTTCGTTTGGACA	RT/ChIP
RLTR13D6_R	CGGCGAAAATGACAGACAGA	RT/ChIP
RLTR9D_F	GCCTTGAAGCAGGCTGATC	RT/ChIP
RLTR9D_R	CATTCTCAGTGGCAGCAAGG	RT/ChIP
L1A_F	TCTGGTGAGTGGAACACAGC	RT/ChIP
L1A_R	AGTCTCGAGTGGAGCGGAAG	RT/ChIP
L1Tf_F	GCCTAAGCCACAGCAGCA	RT/ChIP
L1Tf_R	GCTGTCAGGTTCTCTGGCG	RT/ChIP
L1Gf_F	TGGAATACAGAGTGCCAGCC	RT/ChIP
L1Gf_R	GTGCTCTCACCAGGAAGGTG	RT/ChIP
Orf1_F	ACTCAAAGCGAGGCAACACTAGA	RT/ChIP
Orf1_R	GTTCCAGATTTCTTTCCTAGGGTTTC	RT/ChIP
Orf2_F	CCTCCATTGTTGGTGGGATT	RT/ChIP
Orf2_R	GGAACCGCCAGACTGATTTC	RT/ChIP
MERVL_LTR_F	GCTACACCTTCTGCTGGAGA	RT/ChIP
MERVL_LTR_R	GCAAGCAGGTGAAGGAACAA	RT/ChIP
IAPLTR1_F	CAGCCAATCAGGGAGTGAC	RT/ChIP
IAPLTR1_R	GCAAGAGAGAGAGAAAACGAAA	RT/ChIP
IAPLTR2_F	CAGCCAATCAGGGAGTGAC	RT/ChIP
IAPLTR2_R	ATCTTACACGCGTTCTCG	RT/ChIP
IAP_Gag_F	AATCTCAGAACCGCTCCATGA	RT/ChIP
IAP_Gag_R	TTTCTTAAAATGCCCAGGCTTT	RT/ChIP
HL1-2_F	CTTAGGCCGCCTCTCCAGCG	RT/ChIP
HL1-2_R	CGCCAGAGAACCTGACAGCC	RT/ChIP
HL1-6_F	TCCGGTCCGGAAGGTGGCT	RT/ChIP
HL1-6_R	AGGAAATTAGTCTGAACAGT	RT/ChIP
HL1-7_F	CGCAGTCTCAGGTTCCGTGG	RT/ChIP
HL1-7_R	ACCTTGCCAGCAGAGTCTTA	RT/ChIP
Tet1_F	CCATTCTCACAAGGACATTCACA	RT
Tet1_R	GCAGGACGTGGAGTTGTTCA	RT
Tet2_F	GCCATTCTCAGGAGTCACTGC	RT
Tet2_R	ACTTCTCGATTGTCTTCTCTATTGAGG	RT
Sin3a_F	CAGTTCGGTAGTCAGCCTCA	RT
Sin3a_R	CAGTTCGGTAGTCAGCCTCA	RT
Ogt_F	TGGCGGCAGTAGAAGTCAAT	RT
Ogt_R	TCGATGTGCCAACTCAGCTA	RT
Atp5b_F	GGCCAAGATGTCCTGCTGTT	RT
Atp5b_R	GCTGGTAGCCTACAGCAGAAGG	RT
Hspcb_F	GCTGGCTGAGGACAAGGAGA	RT
Hspcb_R	CGTCGGTTAGTGGAATCTTCATG	RT
L1Tf_NB_F	GCCTAAGCCACAGCAGCA	Northern
L1Tf_NB_F-T7	GGATCCTAATACGACTCACTATAGGGAGAGGAGCCTAAGCCACAGCAGC	Northern
L1Tf_NB_R	GCTGTCAGGTTCTCTGGCG	Northern
L1Tf_NB_R-T7	GGATCCTAATACGACTCACTATAGGGAGAGGAGCTGTCAGGTTCTCTGGCG	Northern
L1A_BS_F	ACACTCTTTCCCTACACGACGCTCTTCCGATCTTTTAAGATTTTTGGTGAGTGG	oxBS-Seq
L1A_BS_R	TGACTGGAGTTCAGACGTGTGCTCTTCCGATCTAACTCTACTAACAAAATAACC	oxBS-Seq
L1Tf_BS_F	ACACTCTTTCCCTACACGACGCTCTTCCGATCTGAGGTAGTATTTTGTGTGGG	oxBS-Seq
L1Tf_BS_R	TGACTGGAGTTCAGACGTGTGCTCTTCCGATCTCACCTATTCAAACTAATTTCC	oxBS-Seq
L1Gf_BS_F	ACACTCTTTCCCTACACGACGCTCTTCCGATCTGTTATTTTTTTGGTGAGAGTA	oxBS-Seq
L1Gf_BS_R	TGACTGGAGTTCAGACGTGTGCTCTTCCGATCTACTAACACTCTATATTCCACA	oxBS-Seq
HL1-2_BS_F	ACACTCTTTCCCTACACGACGCTCTTCCGATCTTTTGTTTTAGAGGTTGTTAGG	oxBS-Seq
HL1-2_BS_R	TGACTGGAGTTCAGACGTGTGCTCTTCCGATCTTACCCTTAAATATACCCCTC	oxBS-Seq
HL1-6_BS_F	ACACTCTTTCCCTACACGACGCTCTTCCGATCTGAGGTTGTTAGGTTTTTTGG	oxBS-Seq
HL1-6_BS_R	TGACTGGAGTTCAGACGTGTGCTCTTCCGATCTCTTCAAATATATCTCACCATTC	oxBS-Seq
HL1-7_BS_F	ACACTCTTTCCCTACACGACGCTCTTCCGATCTGATTTTGTTGGTAAGGTAGG	oxBS-Seq
HL1-7_BS_R	TGACTGGAGTTCAGACGTGTGCTCTTCCGATCTCTCAAACCCAAACTATTTATC	oxBS-Seq
