# Supplementary material for: TET-dependent regulation of retrotransposable elements in mouse embryonic stem cells
Source: Genome Biol. 2016 Nov 18;17:234. doi: 10.1186/s13059-016-1096-8 (PMC5116139; doi:10.1186/s13059-016-1096-8)
Supplement: Additional file 4: — Accession numbers of external datasets. (XLSX 41 kb) [file 13059_2016_1096_MOESM4_ESM.xlsx]

## Sheet: Sheet1
		Accession no.	Source
	ChIP-seq
	TET1 shScr	GSM611192	PMID: 21490601
	TET1 shTet1	GSM611193	PMID: 21490601
	SIN3A	GSM611196	PMID: 21490601
	IgG (TET1,SIN3A)	GSM611198	PMID: 21490601
	OGT	GSM957084	PMID: 23352454
	IgG (OGT)	GSM957085	PMID: 23352454
	CTCF	GSM918748	ENCODE/LICR
	P300	GSM918750	ENCODE/LICR
	Input (CTCF,P300)	GSM918754	ENCODE/LICR
	H3K4me3	GSM769008	ENCODE/LICR
	H3K4me1	GSM769009	ENCODE/LICR
	H3K9me3	GSM1000147	ENCODE/LICR
	H3K27ac	GSM1000099	ENCODE/LICR
	Input (Histones)	GSM769010	ENCODE/LICR
	OCT4	GSM1082340	PMID: 23582322
	SOX2	GSM1082341	PMID: 23582322
	NANOG	GSM1082342	PMID: 23582322
	Input (NOS)	GSM1082343	PMID: 23582322
	TET2	GSM1023124	PMID: 23222540
	5caC shScr	GSM1036275,GSM1122835	PMID: 23602152
	5fC shScr	GSM1036276,GSM1122836	PMID: 23602152
	IgG shScr (5caC,5fC)	GSM1036280,GSM1122839	PMID: 23602152
	5caC shTdg	GSM1036283,GSM1122841	PMID: 23602152
	5fC shTdg	GSM1036286,GSM1122842	PMID: 23602152
	IgG shTdg (5caC,5fC)	GSM1036294,GSM1122845	PMID: 23602152
	SUZ12	GSM327667	PMID: 18974828
	EZH2	GSM327668	PMID: 18974828
	RING1B	GSM327669	PMID: 18974828
	H3K27ac Tet WT	GSM1180181,GSM1180188	PMID: 25263596
	H3K27ac Tet1 KO	GSM1180195,GSM1180202	PMID: 25263596
	H3K27ac Tet2 KO	GSM1180208,GSM1180215	PMID: 25263596
	H3K27me3 Tet WT	GSM1180182,GSM1180189	PMID: 25263596
	H3K27me3 Tet1 KO	GSM1180196,GSM1180203	PMID: 25263596
	H3K27me3 Tet2 KO	GSM1180209,GSM1180216	PMID: 25263596
	H3K4me1 Tet WT	GSM1180178,GSM1180185	PMID: 25263596
	H3K4me1 Tet1 KO	GSM1180192,GSM1180199	PMID: 25263596
	H3K4me1 Tet2 KO	GSM1180206,GSM1180212	PMID: 25263596
	H3K4me3 Tet WT	GSM1180179,GSM1180186	PMID: 25263596
	H3K4me3 Tet1 KO	GSM1180193,GSM1180200	PMID: 25263596
	H3K4me3 Tet2 KO	GSM1180207,GSM1180213	PMID: 25263596
	H3K9me3 Tet WT	GSM1180180,GSM1180187	PMID: 25263596
	H3K9me3 Tet1 KO	GSM1180194,GSM1180201	PMID: 25263596
	H3K9me3 Tet2 KO	GSM1180214	PMID: 25263596
	Input (Tet WT)	GSM1180184,GSM1180191	PMID: 25263596
	Input (Tet1 KO)	GSM1180198,GSM1180205	PMID: 25263596
	Input (Tet2 KO)	GSM1180211,GSM1180218	PMID: 25263596
	hSIN3A	GSM803428	ENCODE/HAIB
	Input (hSIN3A)	GSM803339	ENCODE/HAIB
	TAB-seq
	Tet WT	GSM1180306,GSM1180307,GSM1180308	PMID: 25263596
	Tet1 KO	GSM1180309,GSM1180310,GSM1180311	PMID: 25263596
	Tet2 KO	GSM1180312,GSM1180313,GSM1180314	PMID: 25263596
	hESCs	GSM882245	PMID: 22608086
	BS-seq
	Tet WT	GSM1180315,GSM1180316,GSM1180317	PMID: 25263596
	Tet1 KO	GSM1180318,GSM1180319,GSM1180320	PMID: 25263596
	Tet2 KO	GSM1180321,GSM1180322	PMID: 25263596
	hESCs	GSM432685	NIH Roadmap
	WT blastocysts	ERR906404,ERR906441,ERR906442,ERR906443,ERR906444,ERR906445,ERR906446,ERR906447,ERR906448,ERR906449,ERR906450,ERR906451	PMID: 26199412
	TET DKO blastocysts	ERR906452,ERR906453,ERR906454,ERR906455,ERR906456,ERR906457,ERR906458,ERR906459,ERR906460,ERR906461,ERR906462,ERR906463,ERR906464,ERR906465,ERR906466,ERR906467,ERR906468,ERR906469,ERR906470,ERR906471	PMID: 26199412
	ICM	GSM856542,GSM856545	PMID: 22456710
	ESCs in serum	GSM1053459	PMID: 23850245
	ESCs in 2i	GSM1053462	PMID: 23850245
	ESCs in 2i for 32h	GSM1816837	PMID: 27237052
	ESCs in 2i+vitC for 32h	GSM1816840	PMID: 27237052
	RNA-seq
	WT blastocysts	ERR906477,ERR906478,ERR906479	PMID: 26199412
	TET DKO blastocysts	ERR906472,ERR906473,ERR906474,ERR906475,ERR906476	PMID: 26199412
